# Supplementary material
Source: PubMed Central journal article supplement (PMC7930422)
Supplement: ONCO-26-e403-s002.pdf [file ONCO-26-e403-s002.pdf]

Supplemental Tables for:  
 Myocardial ischemia induced by 5-fluorouracil: a prospective electrocardiographic and cardiac biomarker study  
 Anne Dyhl-Polk et al.

**Table S1: Treatment regimens**

| Treatment regimen                      | Administration                                                                                                                                                                                                                                  |
|----------------------------------------|-------------------------------------------------------------------------------------------------------------------------------------------------------------------------------------------------------------------------------------------------|
| de Gramont                             | 5-FU bolus (400 mg/m <sup>2</sup> ) + 46-hour continuous 5-FU (2400 mg/m <sup>2</sup> ) + Calcium folinate (400 mg/m <sup>2</sup> ) *                                                                                                           |
| FOLFOX                                 | 5-FU bolus (400 mg/m <sup>2</sup> ) + 46-hour continuous 5-FU (2400 mg/m <sup>2</sup> ) + Calcium folinate (400 mg/m <sup>2</sup> ) + oxaliplatin (85 mg/m <sup>2</sup> ) +/- cetuximab (500 mg/m <sup>2</sup> ) and/or panitumumab (6 mg/kg) * |
| FOLFIRI                                | 5-FU bolus (400 mg/m <sup>2</sup> ) + 46-hour continuous 5-FU (2400 mg/m <sup>2</sup> ) + Calcium folinate (400 mg/m <sup>2</sup> ) + irinotecan (180 mg/m <sup>2</sup> ) +/- cetuximab (500 mg/m <sup>2</sup> ) and/or panitumumab (6 mg/kg) * |
| Chemoradiation with 5-FU and cisplatin | 96-hour continuous 5-FU (3200 mg/m <sup>2</sup> ) + cisplatin (75 mg/m <sup>2</sup> ) + radiotherapy **                                                                                                                                         |

\*Two-week schedule. Antiemetics: prednisolone 50 mg day 1–3, ondansetron 16/24 mg day 1 and domperidone 10 mg prn up to three doses per day

\*\*Four-week schedule. Radiotherapy was initiated on day 1 in the first cycle of chemotherapy and was given all weekdays for a total of 30 days. Antiemetics: prednisolone 50 mg day 1–4 and 25 mg day 5+6, aprepitant 125 mg day 1 and 80 mg day 2–3, ondansetron 16 mg day 1 and domperidone 20 mg prn up to three doses per day.

**Table S2: Definition of cardiovascular risk factors**

|                      |                                                                                                                                                                                                                                                              |
|----------------------|--------------------------------------------------------------------------------------------------------------------------------------------------------------------------------------------------------------------------------------------------------------|
| Hypertension         | A medical history or self-reported diagnosis of hypertension or current intake of antihypertensive medications                                                                                                                                               |
| Hypercholesterolemia | A medical history or self-reported diagnosis of hypercholesterolemia or current intake of cholesterol lowering medications and/or a non-fasting total cholesterol > 5.0 mmol/L <sup>a</sup>                                                                  |
| Diabetes             | A medical history or self-reported diagnosis of diabetes or current intake of anti-diabetic medications and/or a fraction of glycosylated hemoglobin (HbA1c) > 48 mmol/mol <sup>b</sup>                                                                      |
| Smoking              | Self-reported smoking habits<br>Categorized as current smoker, former smoker or never smoked                                                                                                                                                                 |
| Body mass index      | Calculated from height and weight<br>Categorized according to WHO's classification in:<br>Underweight (< 18.5 kg/m <sup>2</sup> )<br>Normal (18.5–24.9 kg/m <sup>2</sup> )<br>Overweight (25.0–29.9 kg/m <sup>2</sup> )<br>Obese (> 29.9 kg/m <sup>2</sup> ) |

<sup>a</sup> Nordestgaard BG, Langsted A, Mora S et al. Fasting is not routinely required for determination of a lipid profile: clinical and laboratory implications including flagging at desirable concentration cut-points—a joint consensus statement from the European Atherosclerosis Society and European Federation of Clinical Chemistry and Laboratory Medicine. *European Heart Journal* (2016) 37, 1944–1958. doi:10.1093/eurheartj/ehw152

<sup>b</sup> The Task Force on diabetes, pre-diabetes, and cardiovascular diseases of the European Society of Cardiology (ESC) and developed in collaboration with the European Association for the Study of Diabetes (EASD). ESC Guidelines on diabetes, pre-diabetes, and cardiovascular diseases developed in collaboration with the EASD. *European Heart Journal* (2013) 34, 3035–3087. doi:10.1093/eurheartj/eh108

**Table S3: Intraobserver variability of Holter variables evaluated by re-analyses of 1 day of recording for 10 randomly selected patients**

| <b>Holter parameters</b>                        | <b>Intra-observer agreement / repeatability:</b> |
|-------------------------------------------------|--------------------------------------------------|
| ST elevations (yes/no)                          | NA                                               |
| ST depressions (yes/no)                         | $\kappa = 1.000$ $p = 0.002$                     |
| Fluctuating negative T waves (yes/no)           | $\kappa = 0.615$ $p = 0.035$                     |
| Number of ST elevations                         | NA                                               |
| Number of ST depressions                        | ICC = 0.995 (95% CI 0.983 – 0.999)               |
| Number of minutes with ST deviations            | ICC = 0.971 (95% CI 0.896 – 0.993)               |
| Average duration ischemic episodes              | ICC = 0.990 (95% CI 0.962 – 0.997)               |
| Ischemic burden                                 | ICC = 0.980 (95% CI 0.927 – 0.995)               |
| VT (yes/no)                                     | $\kappa = 1.000$ $p = 0.002$                     |
| Number of VT episodes                           | ICC = 0.602 (95% CI 0.030 - 0.882)               |
| HF max                                          | ICC = 1.000                                      |
| HF min                                          | ICC = 1.000                                      |
| Time to first occurrence of VT or ST deviations | ICC = 1.000                                      |

Intraobserver variability for continuous variables are expressed as intraclass correlation coefficients (ICC) with 95% confidence intervals and intraobserver variability for categorical variables are expressed as kappa values ( $\kappa$ ). For ICC the absolute agreement of single measures was estimated using a two-way mixed model.

**Table S4: Endpoint definitions**

|                                                           |                                                                                                                                                                                                                                                                                                                                                                                                                                                                                                                                                                                                                                     |
|-----------------------------------------------------------|-------------------------------------------------------------------------------------------------------------------------------------------------------------------------------------------------------------------------------------------------------------------------------------------------------------------------------------------------------------------------------------------------------------------------------------------------------------------------------------------------------------------------------------------------------------------------------------------------------------------------------------|
| Clinical events                                           | Including acute coronary syndromes, symptomatic tachyarrhythmias and cardiac arrest.<br>Acute coronary syndromes and myocardial infarction were defined according to current guidelines from the European Society of Cardiology. <sup>a, b</sup>                                                                                                                                                                                                                                                                                                                                                                                    |
| Myocardial ischemia on Holter recording                   | ST elevation of $\geq 1$ mV measured in the J-point lasting at least 1 minute or downsloped or horizontal ST depression of $\geq 1$ mV measured 60 ms after the J-point lasting at least one minute.<br>An interval of $\geq 1$ minute of recording with no ST deviations should be present before a new discrete episode was counted.<br>The PR-segment was used as reference point, but we corrected for baseline ST-abnormalities. <sup>c</sup>                                                                                                                                                                                  |
| Myocardial ischemia on 12-lead ECG                        | Significant ST elevation or significant ST depression in at least two adjacent leads or negative T-waves of $\geq 0.1$ mV in two adjacent leads with prominent R or $R/S > 1$ .<br>ST elevation was measured in the J-point and considered significant if $\geq 0.25$ mV in V2-V3 for men $< 40$ years old, $\geq 0.20$ mV in V2-V3 for men $> 40$ years old, $\geq 0.15$ mV in V2-V3 for women and $\geq 0.10$ mV in all other leads.<br>ST depression was measured 60 ms after the J-point and horizontal or downsloped depressions of $\geq 0.05$ mV in at least two adjacent leads were considered significant. <sup>d, e</sup> |
| Troponin I, elevations and fluctuations                   | Elevations: Defined as values above the upper 99th percentile cut-off of 40 ng/L. <sup>f</sup><br>Fluctuations: Increases in troponin I plasma concentrations larger than the assay variation but below the 99th percentile. According to the assay specifications an increase in troponin of 44.4% is considered clinically significant.                                                                                                                                                                                                                                                                                           |
| Copeptin                                                  | Copeptin was analyzed as a continuous variable.<br>Secondly, the number of patients with co-peptin levels above the suggested cut-off for myocardial infarction (10 pmol/L) is given.                                                                                                                                                                                                                                                                                                                                                                                                                                               |
| Ventricular tachyarrhythmia (both 12 lead ECG and Holter) | $\geq 3$ complexes with a QRS interval $> 120$ ms and $\geq 100$ beats per minute. <sup>h</sup>                                                                                                                                                                                                                                                                                                                                                                                                                                                                                                                                     |
| QTc                                                       | QT was measured on resting 12-lead ECG and corrected by use of Bazett's formula <sup>i</sup>                                                                                                                                                                                                                                                                                                                                                                                                                                                                                                                                        |

<sup>a</sup> Thygesen K, Alpert JS, Jaffe AS, Chaitman BR, Bax JJ, Morrow DA et al. Fourth universal definition of myocardial infarction (2018). *Eur Heart J* 2018.

<sup>b</sup> Roffi M, Patrono C, Collet JP, Mueller C, Valgimigli M, Andreotti F et al. 2015 ESC Guidelines for the management of acute coronary syndromes in patients presenting without persistent ST-segment elevation: Task Force for the Management of Acute Coronary Syndromes in Patients Presenting without Persistent ST-Segment Elevation of the European Society of Cardiology (ESC). *Eur Heart J* 2016;37:267-315.

<sup>c</sup> Bjerregaard P, El-Shafei A, Kotar SL, Labovitz AJ. ST segment analysis by Holter Monitoring: methodological considerations. *Ann Noninvasive Electrocardiol.* 2003 Jul;8(3):200-7.

<sup>d</sup> Guidelines from The Danish Society of Cardiology: <https://www.nbv.cardio.dk/aks>. Assessed 15<sup>th</sup> of January 2019.

<sup>e</sup> ESC Scientific Document Group; 2017 ESC Guidelines for the management of acute myocardial infarction in patients presenting with ST-segment elevation of the European Society of Cardiology (ESC), *Eur Heart J* 2018 Jan 7;39(2):119-177. doi: 10.1093/eurheartj/ehx393.

<sup>f</sup> Apple FS, Sandoval Y, Jaffe AS, et al: Cardiac Troponin Assays: Guide to Understanding Analytical Characteristics and Their Impact on Clinical Care. *Clin Chem* 63:73-81, 2017

<sup>g</sup> Mueller C, Möckel M, Giannitsis E et al. Study Group on Biomarkers in Cardiology of the Acute Cardiovascular Care Association. Use of copeptin for rapid rule-out of acute myocardial infarction. *Eur Heart J Acute Cardiovasc Care*. 2018 Sep;7(6):570-576. doi: 10.1177/2048872617710791.

<sup>h</sup> Katritsis DG, Zareba W, Camm AJ. Nonsustained ventricular tachycardia. *J Am Coll Cardiol*. 2012 Nov 13;60(20):1993-2004. doi: 10.1016/j.jacc.2011.12.063. Epub 2012 Oct 17.

<sup>i</sup> QT interval and drug therapy. *Bmj* 2016;353:i2732.

**Table S5: Details concerning patients with acute coronary syndromes**

| Case | Treatment                        | Dose intensity of 5-FU | Cycle of onset (day) | Symptoms                                       | Type of event   | ECG changes on Holter recording              | ECG changes on 12-lead ECG                  | Elevated troponin or CK-MB | Other findings                                                            | Initiated cardiac therapy                                    | Retreatment with 5-FU, dose intensity | Symptoms at retreatment |
|------|----------------------------------|------------------------|----------------------|------------------------------------------------|-----------------|----------------------------------------------|---------------------------------------------|----------------------------|---------------------------------------------------------------------------|--------------------------------------------------------------|---------------------------------------|-------------------------|
| 1    | Adj. FOLFOX                      | 100%                   | 1 (3)                | Chest pain radiating to left arm, palpitations | Unstable angina | No                                           | No                                          | No                         | No                                                                        | NTG, ASA, Brillique, Arixtra, Statin, Isosorbide mononitrate | Yes, 100%                             | Chestpain cycle 3       |
| 2    | Chemoradiation, 5-FU + cisplatin | 100%                   | 1 (4)                | Chest pain                                     | Unstable angina | ST↑ (day 4)                                  | No                                          | No                         | ECHO: Normal                                                              | No                                                           | No                                    | -                       |
| 3    | Met. FOLFIRI + cetuximab         | 75%                    | 2 (2)                | Chest pain, dyspnea                            | Unstable angina | -                                            | ST ↑                                        | No                         | ECHO: Normal<br>CAG: No stenoses                                          | ASA, Brillique                                               | No                                    | -                       |
| 4    | Met. FOLFOX + panitumumab        | 75%                    | 1 (1)                | Severe nausea, dyspnea                         | STEMI           | ST ↑ (day 1+2)                               | ST ↑, negative T-waves                      | TnI ↑<br>CK-MB ↑           | ECHO: LVEF 35-40%, regional wall-motion abnormalities<br>CAG: no stenoses | NTG, Isosorbide mononitrate                                  | No                                    | -                       |
| 5    | Adj. FOLFOX                      | 100%                   | 1 (1)                | Severe nausea                                  | NSTEMI          | ST ↑ (day 1+2), ST ↓ (day 2)<br>NSVT (day 2) | Non-significant ST ↑ in II, III, aVF, V4-V6 | TnI ↑                      | No                                                                        | NaCl infusion                                                | No                                    | -                       |

| Case | Treatment   | Dose intensity of 5-FU | Cycle of onset (day) | Symptoms       | Type of event  | ECG changes on Holter recording | ECG changes on 12-lead ECG                         | Elevated troponin or CK-MB | Other findings                                            | Initiated cardiac therapy                                  | Retreatment with 5-FU, dose intensity | Symptoms at retreatment |
|------|-------------|------------------------|----------------------|----------------|----------------|---------------------------------|----------------------------------------------------|----------------------------|-----------------------------------------------------------|------------------------------------------------------------|---------------------------------------|-------------------------|
| 6    | Adj. FOLFOX | 100 %                  | 1 (3)                | Cardiac arrest | Cardiac arrest | ST ↑ (day 2) ST↓ (day 2)        | Sustained VF After ROSC: ST ↑, atrial fibrillation | TnI ↑ CK-MB ↑              | ECHO: biventricular failure, LVEF 15-20% CAG: No stenosis | CPR, defibrillation, therapeutic hypothermia, ASA, Heparin | No                                    | -                       |

Adj., adjuvant; Met., metastatic; FOLFOX, 5-FU + oxaliplatin; FOLFIRI, 5-FU + irinotecan; ECG, electrocardiogram; STEMI, ST-elevation myocardial infarction; NSVT, non-sustained ventricular tachycardia; VF, ventricular fibrillation; TnI, troponin I; CK-MB, creatine kinase MB; ECHO, echocardiography; LVEF, left ventricular ejection fraction; CAG, coronary angiography; CPR, cardiopulmonary resuscitation; ROSC, return of spontaneous circulation; ASA, ; NTG, nitroglycerin.

**Table S6: Patients with silent myocardial ischemia**

| Case (continued from Table A5) | Treatment                        | Dose intensity of 5-FU | Ischemia before 1st cycle   | Ischemia during 1st cycle                     | Ischemia before 2 <sup>nd</sup> /3 <sup>rd</sup> /4 <sup>th</sup> cycle | Ischemia during 2 <sup>nd</sup> /3 <sup>rd</sup> /4 <sup>th</sup> cycle | Other findings                                                         | Initiated cardiac therapy | Retreatment with 5-FU, dose intensity           |
|--------------------------------|----------------------------------|------------------------|-----------------------------|-----------------------------------------------|-------------------------------------------------------------------------|-------------------------------------------------------------------------|------------------------------------------------------------------------|---------------------------|-------------------------------------------------|
| 7                              | Chemoradiation, 5-FU + cisplatin | 100%                   | ST↓                         | ST↓ (day 1+2+3+4)                             | No                                                                      | ST↓ (day 3+4)                                                           | -                                                                      | No                        | Yes, 100%                                       |
| 8                              | Chemoradiation, 5-FU + cisplatin | 100%                   | ST↓, negative T-waves       | ST↓ (day 1+2+3+4), negative T-waves           | -                                                                       | -                                                                       | NSVT (baseline + day 1+2+3+4)                                          | No                        | No                                              |
| 9                              | Adj. FOLFOX                      | 100%                   | ST↓                         | ST↓ (day 1+2+3+4)                             | -                                                                       | -                                                                       | Transient SA block grade 3 with atrial escape rhythm. CAG: No stenoses | Betablocker               | No                                              |
| 10                             | Adj. FOLFOX                      | 100%                   | ST ↑, ST↓, negative T-waves | ST↓ (day 1+2), negative T-waves, ST ↑ (day 2) | No                                                                      | No                                                                      | CAG: No stenoses                                                       | No                        | Yes, reduced to 75% after 1st cycle             |
| 11                             | Adj. FOLFOX                      | 100%                   | No                          | -                                             | ST↓                                                                     | ST↓ (day 1+2)                                                           | No                                                                     | No                        | Yes, reduced to 50% after 3 <sup>rd</sup> cycle |
| 12                             | Adj. FOLFOX                      | 100%                   | No                          | No                                            | ST ↑                                                                    | ST ↑ (day 1)                                                            | No                                                                     | No                        | Yes, 100%                                       |
| 13                             | Chemoradiation, 5-FU + cisplatin | 100%                   | No                          | ST↓ (day 1)                                   | -                                                                       | -                                                                       | Excessive supraventricular activity                                    | No                        | No                                              |
| 14                             | Adj. FOLFOX                      | 100%                   | No                          | ST↓ (day 1)                                   | No                                                                      | No                                                                      | NSVT (day 1)                                                           | Calcium antagonist        | Yes, 100%                                       |
| 15                             | Adj. FOLFOX                      | 100%                   | No                          | ST↓ (day 2), negative T-waves                 | No                                                                      | No                                                                      | No                                                                     | No                        | Yes, 100%                                       |



|    |                                  |      |    |                                         |    |              |                                                                       |                    |                                                 |
|----|----------------------------------|------|----|-----------------------------------------|----|--------------|-----------------------------------------------------------------------|--------------------|-------------------------------------------------|
| 16 | Adj. FOLFOX                      | 100% | No | ST↓ (day 2)                             | No | ST ↑ (day 2) | No                                                                    | Calcium antagonist | Yes, reduced to 75% after 3 <sup>rd</sup> cycle |
| 17 | Met. FOLFOX                      | 100% | No | ST↓ (day 2), negative T-waves (day 1)   | -  | -            | No                                                                    | No                 | No                                              |
| 18 | Met. FOLFIRI                     | 100% | No | Day 2+3 ST↓ (day 2+3), negative T-waves | -  | -            | No                                                                    | No                 | No                                              |
| 19 | Chemoradiation, 5-FU + cisplatin | 100% | No | ST↑ (day 3)                             | No | No           | Transient SA block grade 3 with atrial escape rhythm (cycle 1, day 3) | No                 | Yes, 100%                                       |
| 20 | Chemoradiation, 5-FU + cisplatin | 75%  | No | No                                      | No | ST↓ (day 2)  | No                                                                    | No                 | No, completed treatment                         |
| 21 | Adj. FOLFOX                      | 100% | No | No                                      | No | ST↓ (day 2)  | No                                                                    | No                 | Yes, 100%                                       |

Adj., adjuvant; Met., metastatic; FOLFOX, 5-FU + oxaliplatin; FOLFIRI, 5-FU + irinotecan; NSVT, non-sustained ventricular tachycardia; SA, sinus atrial; CAG, coronary angiography.

### Day-to-day variation of ischemic episodes before 5-FU treatment

Among the 107 patients evaluable for myocardial ischemia before and during 1<sup>st</sup> 5-FU infusion, 65 had  $\geq 2$  days of Holter recording before 1<sup>st</sup> 5-FU infusion, allowing for the assessment of day-to-day variability. The variability in ischemic episodes was calculated by subtracting the “best day” from the “worst day”.

Of the 65 patients evaluable for day-to-day variability before 1<sup>st</sup> 5-FU infusion, 62 patients had no episodes of myocardial ischemia and thus a day-to-day variability of 0, while three had myocardial ischemia. For these three patients, the variability in number of episodes was four, four and 19 (corresponding to 44%, 49% and 60%, respectively), while the variability in total duration of ischemic episodes was 4.5, 44.4 and 65.3 minutes (corresponding to 13%, 18% and 56%, respectively), and the variability in ischemic burden was 8.8, 102.3 and 188.4 mm\*min (corresponding to 20%, 26% and 58%, respectively).

In 2<sup>nd</sup>/3<sup>rd</sup> or 4<sup>th</sup> cycle, 84 patients were evaluable for ischemia analyses, and among these, 45 had  $\geq 2$  days of Holter recording before 5-FU infusion. Only two patients had myocardial ischemia before infusion and both patients had a variability in number of episodes (1 and 3), total duration of episodes (9.1 and 42.0) and ischemic burden (25.9 and 73.5) of 100%, since myocardial ischemia was observed on only 1 day before treatment (one episode in one patient and three in the other) The other 43 patients had a variability of 0%.

### Day-to day variation in ischemia during 5-FU treatment

The day-to-day variation in ischemic burden during 5-FU infusion is shown graphically for patients with myocardial ischemia in Figures A2a and b and Figures A3a and b:

**Table S7: Median recording time**

|                                                                               | Before 5-FU infusion (hours) | During 46-hour 5-FU infusion (hours) | During 96-hour 5-FU infusion (hours) |
|-------------------------------------------------------------------------------|------------------------------|--------------------------------------|--------------------------------------|
| First cycle                                                                   | 53.3 (range 10.5–99.2)       | 47.5 (range 26.0–96.0)               | 93.2 (range 89.8–120.0)              |
| Second recording (2 <sup>nd</sup> , 3 <sup>rd</sup> or 4 <sup>th</sup> cycle) | 48.0 (range 2.1–100.4)       | 47.7 (range 21.6–131.6)              | 93.3 (range 32.7–143.2)              |

**Table S8: The number and duration of ischemic episodes and the total ischemic burden per patient per 24 hours**

|                                                                       | Before 1 <sup>st</sup> 5-FU infusion (n = 107) | During 1 <sup>st</sup> 5-FU infusion (n = 106) | Before 2 <sup>nd</sup> , 3 <sup>rd</sup> or 4 <sup>th</sup> 5-FU infusion (n = 84) | During 2 <sup>nd</sup> , 3 <sup>rd</sup> or 4 <sup>th</sup> 5-FU infusion (n = 84) |
|-----------------------------------------------------------------------|------------------------------------------------|------------------------------------------------|------------------------------------------------------------------------------------|------------------------------------------------------------------------------------|
| Total ischemic burden <sup>a</sup> (mm*min)                           | 8.05                                           | 39.53                                          | 0.38                                                                               | 3.00                                                                               |
| Total duration of episodes with ST-depression <sup>a</sup> (min)      | 4.23                                           | 9.20                                           | 0.16                                                                               | 1.09                                                                               |
| Total duration of episodes with ST-elevation <sup>a</sup> (min)       | 0.40                                           | 8.18                                           | 0.03                                                                               | 0.20                                                                               |
| Number of episodes with ST-depression <sup>a</sup>                    | 0.42                                           | 0.74                                           | 0.004                                                                              | 0.10                                                                               |
| Number of episodes with ST-elevation <sup>a</sup>                     | 0.01                                           | 0.35                                           | 0.01                                                                               | 0.01                                                                               |
| Number of patients with both symptomatic and silent ischemic episodes | 0                                              | 4                                              | 0                                                                                  | 0                                                                                  |

<sup>a</sup>per patient per 24 hours

**Table S9: Myocardial ischemia according to the different days in cycle 1: Results obtained with Friedman's test**

|                                    | Row Mean Scores Differ (Degrees of freedom) | p-value      |
|------------------------------------|---------------------------------------------|--------------|
| <i>Bolus plus 46-hour infusion</i> |                                             |              |
| Ischemic burden                    | 12.41 (2)                                   | <b>0.002</b> |
| Total duration of ischemia         | 11.57 (2)                                   | <b>0.003</b> |
| Number of ST depression episodes   | 12.48 (2)                                   | <b>0.002</b> |
| Number of ST elevation episodes    | 2.71 (2)                                    | 0.257        |
| <i>96-hour continuous infusion</i> |                                             |              |
| Ischemic burden                    | 0.86 (4)                                    | 0.931        |
| Total duration of ischemia         | 1.00 (4)                                    | 0.910        |
| Number of ST depression episodes   | 1.12 (4)                                    | 0.891        |
| Number of ST elevation episodes    | 3.00 (4)                                    | 0.558        |

P values in bold are significant

**Table S10: Myocardial ischemia according to the different days in cycle 1: Bonferroni corrected p-values from Wilcoxon signed rank test for patients receiving 46-hour infusion**

|                                         | p-value<br>(Bonferroni<br>corrected) |
|-----------------------------------------|--------------------------------------|
| <i>Ischemic burden</i>                  |                                      |
| Day 1 v 0                               | 0.180                                |
| Day 2 v 0                               | <b>0.027</b>                         |
| Day 2 v 1                               | 0.097                                |
| <i>Total duration of ischemia</i>       |                                      |
| Day 1 v 0                               | 0.130                                |
| Day 2 v 0                               | <b>0.023</b>                         |
| Day 2 v 1                               | 0.085                                |
| <i>Number of ST-depression episodes</i> |                                      |
| Day 1 v 0                               | 0.540                                |
| Day 2 v 0                               | <b>0.042</b>                         |
| Day 2 v 1                               | 0.052                                |

P values in bold are significant
